# Supplementary material for: Fine-tuning of lanthanide-monocarboxylate coordination networks through ligand decoration
Source: Royal Society of Chemistry journal article supplement (doi:10.1039/c1dt10917k), 2011-01-01
Supplement: c1dt10917k.pdf [file c1dt10917k.pdf]

## Supporting Information

### **Fine-tuning of lanthanide – monocarboxylate coordination networks through ligand decoration**

Zeeshan Majeed,<sup>a</sup> George E. Kostakis,<sup>b</sup> Yanhua Lan<sup>a</sup> and Annie K. Powell<sup>a,b\*</sup>

<sup>a</sup> Institute of Inorganic Chemistry, Karlsruhe Institute of Technology, Engessertsr. 15, D-76131, Karlsruhe, Germany.

<sup>b</sup> Institute of Nanotechnology, Karlsruhe Institute of Technology, D-76131, Karlsruhe, Germany.

E-mail: [annie.powell@kit.edu](mailto:annie.powell@kit.edu); Fax: +49 721 608 48142; Tel: +49 721 608 42135

**Table S1** Unit cell parameters for **4 – 8**

| Cell parameters    | <b>6</b>    | <b>7</b>    | <b>4</b>    | <b>5</b>   | <b>8</b>    |
|--------------------|-------------|-------------|-------------|------------|-------------|
| $a(\text{Å})$      | 16.1563(12) | 16.1132(10) | 16.5467(15) | 16.1249(3) | 16.8910(18) |
| $b(\text{Å})$      | 16.2320(12) | 16.1132(10) | 16.3245(15) | 16.1249(3) | 16.8910(18) |
| $c(\text{Å})$      | 19.3560(13) | 19.1089(12) | 19.2078(19) | 19.5060(9) | 19.5121(18) |
| $\alpha(^{\circ})$ | 90          | 90          | 90          | 90         | 90          |
| $\beta(^{\circ})$  | 90          | 90          | 90          | 90         | 90          |
| $\gamma(^{\circ})$ | 90          | 90          | 90          | 90         | 90          |

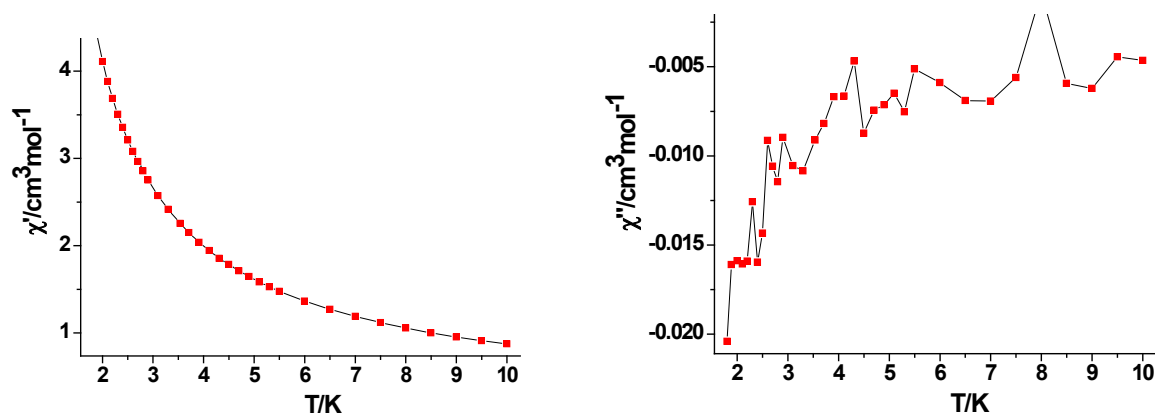

**Fig. S1** Temperature dependence of the in-phase (left) and out-of-phase (right) components of the ac magnetic susceptibility, for **9** under zero dc field.

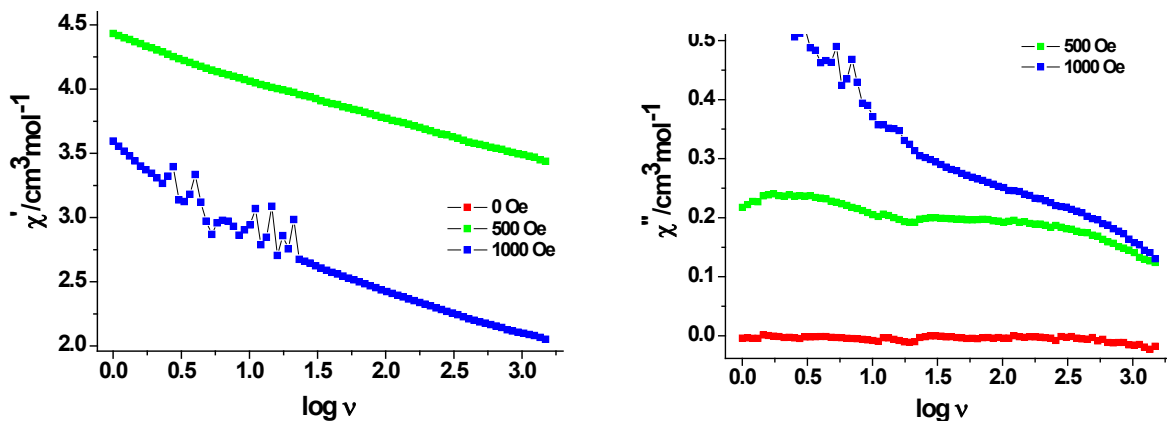

**Fig. S2** Frequency dependence at 1.8 K of the in-phase (left) and the out-of-phase (right) ac susceptibility components at different dc fields for **9**.

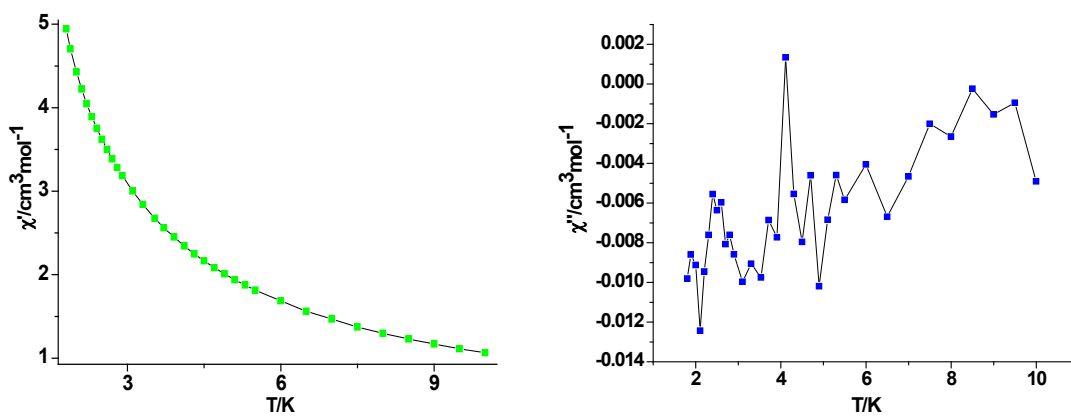

**Fig. S3** Temperature dependence of the in-phase (left) and out-of-phase (right) components of the ac magnetic susceptibility, for **10** under zero dc field.

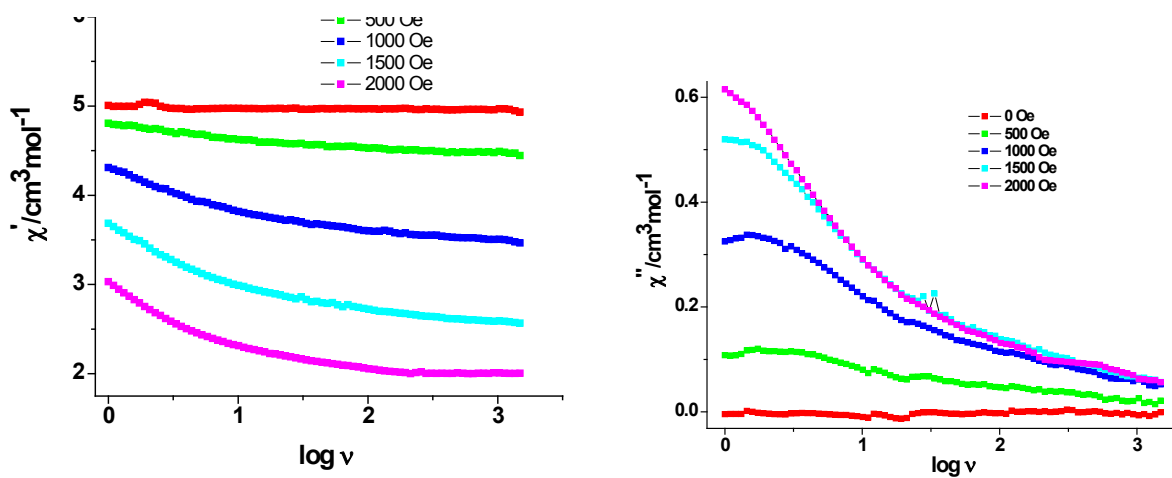

**Fig.S4** Frequency dependence at 1.8 K of the in-phase (left) and the out-of-phase (right) ac susceptibility components at different dc fields for **10**.
